# Supplementary material
Source: publisher figshare collection journal article supplement (https://sage.figshare.com/ndownloader/files/12370484)
Supplement: Supplementary file 1 [file 12370484]

## Sheet: Foglio1
ID #	Age	BMI	Symptoms duration	preop. mHHS	Job (sedentary, active, physically demanding)	Sport (none, recreational/occasional, amateur, semi-pro, pro)	Hip osteoarthritis in relatives	Impingement type	Alfa AP	Alfa Axial	LCE	Tönnis' grade	Satisfaction dichotomic	Satisfaction NRS	mHHS post	Return to sport	Return to sport (mo. after surgery)	Tegner activity level (10 - 0)	Return to sport same level	Revision arthroscopy	Total hip replacement	Follow-up (months)		OR (mHHS preop)	OR (duration)	OR (Tönnis)	FAI-POPS	T+	SMO (VERO=+)	TRUE POS	FALSE POS	TRUE NEG	FALSE NEG
1	40	23.4	18	74.8	sedentary	amateur	yes	cam	52	73	30	1	yes	8	92.6	yes	6	6	yes	no	no	36		1	1.1	4.2	6.3	1	TRUE	VP
2	32	21.6	6	73.7	active	amateur	yes	combined	50	74	37	1	yes	8	94.2	yes	8	7	yes	no	no	36		1	2.7	4.2	7.9	1	TRUE	VP
3	23	23.6	3	79.2	physically demanding	semi-pro	no	cam	53	76	30	0	yes	10	100	yes	4	9	yes	no	no	36		1	2.7	7.7	11.4	1	TRUE	VP
4	35	25.3	12	75.9	sedentary	semi-pro	no	combined	50	73	36	1	yes	8	93.5	yes	9	8	yes	no	no	36		1	1.1	4.2	6.3	1	TRUE	VP
5	38	25.5	20	76.4	physically demanding	amateur	yes	combined	48	74	37	2	yes	7	92.8	yes	7	6	yes	no	no	36		1	1	1	3	0	TRUE				FN
6	26	23.8	6	81.4	active	semi-pro	yes	combined	50	71	35	0	yes	10	100	yes	7	8	yes	no	no	36		1	2.7	7.7	11.4	1	TRUE	VP
7	37	26.5	14	74.8	active	amateur	yes	combined	53	61	30	1	yes	8	90.2	yes	5	6	yes	no	no	36		1	1.1	4.2	6.3	1	TRUE	VP
8	35	24.8	12	69.3	sedentary	amateur	yes	combined	56	65	35	1	yes	7	91.7	yes	6	6	yes	no	no	34		0.4	1.1	4.2	5.7	0	TRUE				FN
9	30	23.7	8	84.8	active	semi-pro	no	cam	52	71	32	0	yes	9	97.8	yes	6	8	yes	no	no	32		1	2.7	7.7	11.4	1	TRUE	VP
10	33	25.8	14	79.8	active	semi-pro	yes	combined	58	66	35	1	yes	9	96.6	yes	5	8	yes	no	no	32		1	1.1	4.2	6.3	1	TRUE	VP
11	24	24.3	9	84.8	active	semi-pro	no	cam	54	69	35	0	yes	8	97.8	yes	8	8	yes	no	no	32		1	2.7	7.7	11.4	1	TRUE	VP
12	32	25.5	12	86.4	active	amateur	yes	cam	50	68	36	1	yes	10	100	yes	3	7	yes	no	no	32		1	1.1	4.2	6.3	1	TRUE	VP
13	18	22.3	9	88.6	sedentary	semi-pro	no	cam	50	70	28	0	yes	10	100	yes	3	7	yes	no	no	32		1	2.7	7.7	11.4	1	TRUE	VP
14	34	25.8	20	80.6	physically demanding	amateur	yes	combined	54	67	36	1	yes	9	98.2	yes	6	6	yes	no	no	32		1	1	4.2	6.2	0	TRUE				FN
15	34	25.6	18	82.6	active	amateur	yes	combined	50	65	35	1	yes	9	98.4	yes	5	6	yes	no	no	32		1	1.1	4.2	6.3	1	TRUE	VP
16	33	23.8	18	76.8	sedentary	amateur	no	combined	53	70	36	2	yes	10	100	yes	7	6	yes	no	no	30		1	1.1	1	3.1	0	TRUE				FN
17	35	26.4	24	68.8	sedentary	amateur	yes	combined	50	66	35	2	yes	10	98.6	yes	3	7	no	no	no	30		0.4	1	1	2.4	0	TRUE				FN
18	29	24.2	8	83.4	active	amateur	yes	combined	54	68	34	1	yes	10	100	yes	5	6	yes	no	no	30		1	2.7	4.2	7.9	1	TRUE	VP
19	41	25.3	18	78.6	sedentary	amateur	yes	combined	50	65	35	1	yes	10	98.6	yes	4	8	yes	no	no	30		1	1.1	4.2	6.3	1	TRUE	VP
20	36	24.3	12	81.4	sedentary	amateur	no	combined	54	70	32	1	yes	9	97.8	yes	6	6	yes	no	no	30		1	1.1	4.2	6.3	1	TRUE	VP
21	39	22.8	18	78.8	active	amateur	yes	combined	50	64	34	1	yes	9	96.5	yes	7	6	yes	no	no	30		1	1.1	4.2	6.3	1	TRUE	VP
22	30	24.3	9	81.2	active	semi-pro	yes	cam	52	70	32	1	yes	8	97.4	yes	6	7	yes	no	no	28		1	2.7	4.2	7.9	1	TRUE	VP
23	34	21.8	12	84.3	sedentary	amateur	yes	combined	50	65	37	1	yes	10	100	yes	6	6	yes	no	no	28		1	1.1	4.2	6.3	1	TRUE	VP
24	42	25.6	18	83.6	sedentary	amateur	yes	combined	48	68	36	2	yes	9	96.8	yes	5	6	yes	no	no	28		1	1.1	1	3.1	0	TRUE				FN
25	37	26.2	12	81.8	sedentary	amateur	yes	combined	52	71	35	1	yes	10	100	yes	4	6	yes	no	no	28		1	1.1	4.2	6.3	1	TRUE	VP
26	42	24.8	8	86.4	physically demanding	semi-pro	no	cam	50	74	34	1	yes	8	97.6	yes	4	7	yes	no	no	28		1	2.7	4.2	7.9	1	TRUE	VP
27	20	21.8	6	86.2	sedentary	semi-pro	no	combined	52	66	32	0	yes	10	100	yes	7	7	yes	no	no	28		1	2.7	7.7	11.4	1	TRUE	VP
28	24	22.8	7	88.2	active	semi-pro	yes	combined	54	71	36	0	yes	8	95.8	yes	6	7	yes	no	no	28		1	2.7	7.7	11.4	1	TRUE	VP
29	33	25.8	2	96.4	active	semi-pro	yes	combined	56	68	35	0	yes	10	98.8	yes	3	8	yes	no	no	28		1	2.7	7.7	11.4	1	TRUE	VP
30	30	23.4	12	87.5	sedentary	amateur	yes	combined	50	65	34	1	yes	8	96.4	yes	5	5	yes	no	no	28		1	1.1	4.2	6.3	1	TRUE	VP
31	29	24.5	8	86.2	active	semi-pro	yes	combined	52	70	33	1	yes	9	97.2	yes	6	7	yes	no	no	28		1	2.7	4.2	7.9	1	TRUE	VP
32	37	24.3	18	83.5	active	semi-pro	yes	cam	46	64	34	2	yes	8	97.4	yes	4	9	yes	no	no	27		1	1.1	1	3.1	0	TRUE				FN
33	39	25.2	24	76.8	active	amateur	yes	combined	48	70	35	2	yes	7	94.4	yes	6	7	no	no	no	27		1	1	1	3	0	TRUE				FN
34	20	21.5	9	86.4	sedentary	semi-pro	no	combined	50	62	38	0	yes	10	100	yes	5	9	yes	no	no	27		1	2.7	7.7	11.4	1	TRUE	VP
35	50	26.7	24	71.3	physically demanding	amateur	yes	combined	58	72	36	3	yes	7	90.2	yes	8	5	no	no	yes	27		0.4	1	1	2.4	0	FALSE			VN
36	34	23.6	24	78.8	sedentary	amateur	yes	combined	50	64	32	2	yes	8	96.2	yes	3	5	yes	no	no	27		1	1	1	3	0	TRUE				FN
37	28	24.1	9	85.4	active	semi-pro	yes	cam	60	71	30	1	yes	9	98.2	yes	4	7	yes	no	no	27		1	2.7	4.2	7.9	1	TRUE	VP
38	28	23.9	12	84.6	physically demanding	semi-pro	yes	cam	48	68	32	1	yes	9	98.8	yes	4	7	yes	no	no	27		1	1.1	4.2	6.3	1	TRUE	VP
39	29	22.5	24	62.4	active	semi-pro	no	cam	50	73	34	1	yes	8	94.2	yes	4	8	yes	no	no	26		0.3	1	4.2	5.5	0	TRUE				FN
40	42	25.6	36	54.2	physically demanding	amateur	yes	combined	50	77	38	2	yes	7	84.3	yes	8	5	yes	no	yes	26		0.3	1	1	2.3	0	FALSE			VN
41	32	24.2	18	62.4	physically demanding	semi-pro	no	combined	55	72	37	2	yes	8	94.2	yes	10	8	yes	no	no	26		0.3	1.1	1	2.4	0	TRUE				FN
42	26	24.1	9	78.8	active	semi-pro	yes	combined	48	67	35	0	yes	9	98.2	yes	7	7	yes	no	no	26		1	2.7	7.7	11.4	1	TRUE	VP
43	57	26.2	12	79.2	active	amateur	yes	combined	77	82	28	1	yes	8	100.1	yes	7	6	yes	no	no	31		1	1.1	4.2	6.3	1	TRUE	VP
44	42	25.6	18	58.3	active	amateur	no	combined	73	66	26	1	yes	10	100.1	no	no	5	no	no	no	25		0.3	1.1	4.2	5.6	0	FALSE			VN
45	52	30	18	47.3	active	none	no	combined	46	51	25	0	yes	10	100.1	no	no	3	no	no	no	24		0.3	1.1	7.7	9.1	1	TRUE	VP
46	40	24.1	48	49.5	physically demanding	none	no	combined	83	84	45	3	no	6	90.2	no	no	5	no	no	no	29		0.3	1	1	2.3	0	FALSE			VN
47	37	24.8	36	71.5	sedentary	amateur	yes	combined	46	86	29	1	yes	8	95.7	yes	5	7	yes	no	no	29		0.4	1	4.2	5.6	0	TRUE				FN
48	51	28.4	72	50.6	active	none	no	cam	52	65	38	1	yes	9	92.4	no	no	3	no	no	yes	33		0.3	1	4.2	5.5	0	FALSE			VN
49	39	24.1	6	75.9	active	semi-pro	no	combined	82	73	33	2	yes	8	100.1	yes	4	5	yes	no	no	52		1	2.7	1	4.7	0	TRUE				FN
50	32	25.2	54	62.7	physically demanding	amateur	no	combined	55	55	36	0	yes	9	100.1	yes	5	5	yes	no	no	57		0.3	1	7.7	9	1	TRUE	VP
51	45	26.5	18	33	physically demanding	amateur	no	combined	71	53	39	1	yes	9	100.1	yes	3	5	yes	no	no	27		0.3	1.1	4.2	5.6	0	TRUE				FN
52	39	37	36	47.3	physically demanding	none	no	combined	84	78	21	2	no	4	47.3	no	no	4	no	no	yes	56		0.3	1	1	2.3	0	FALSE			VN
53	46	29.9	48	74.8	physically demanding	amateur	no	combined	40	55	26	1	yes	9	100.1	yes	3	5	yes	no	no	40		1	1	4.2	6.2	0	TRUE				FN
54	50	28.7	36	27.5	sedentary	none	no	combined	98	105	37	3	yes	10	75.9	no	no	3	no	no	yes	53		0.3	1	1	2.3	0	FALSE			VN
55	22	22.8	72	50.6	sedentary	none	no	pincer	43	73	34	0	yes	10	95.7	no	no	3	no	no	no	39		0.3	1	7.7	9	1	TRUE	VP
56	46	22.1	7	69.3	physically demanding	semi-pro	no	combined	65	50	36	0	yes	10	100.1	no	no	4	no	no	no	24		0.4	2.7	7.7	10.8	1	FALSE		FP
57	52	31	24	53.9	active	none	no	combined	77	85	29	2	no	4	81.4	no	no	4	no	no	yes	59		0.3	1	1	2.3	0	FALSE			VN
58	50	25.3	48	73.7	physically demanding	semi-pro	no	combined	70	78	53	1	no	3	60.5	no	no	5	no	no	no	32		1	1	4.2	6.2	0	FALSE			VN
59	28	19.1	8	70.4	active	none	no	combined	45	55	35	0	yes	9	100.1	yes	3	4	yes	no	no	24		0.4	2.7	7.7	10.8	1	TRUE	VP
60	38	26.8	90	64.9	sedentary	semi-pro	no	cam	45	71	26	0	yes	10	100.1	no	no	3	no	no	no	37		0.4	1	7.7	9.1	1	FALSE		FP
61	41	22.2	24	41.8	physically demanding	none	yes	combined	94	80	28	2	yes	10	100.1	no	no	5	no	no	no	45		0.3	1	1	2.3	0	TRUE				FN
62	51	28.1	36	40.7	physically demanding	none	yes	combined	69	74	29	2	no	2	62.7	no	no	3	no	no	yes	53		0.3	1	1	2.3	0	FALSE			VN
63	40	21.3	12	74.8	sedentary	none	yes	cam	43	70	32	0	yes	10	100.1	no	no	3	no	no	no	24		1	1.1	7.7	9.8	1	TRUE	VP
64	45	31.1	48	58.3	active	none	no	combined	90	85	30	3	yes	7	100.1	yes	3	3	yes	no	yes	60		0.3	1	1	2.3	0	FALSE			VN
65	63	23.9	5	62.7	sedentary	none	no	combined	44	64	30	1	yes	10	100.1	no	no	1	no	no	no	49		0.3	2.7	4.2	7.2	1	TRUE	VP
66	48	21.9	18	55	sedentary	semi-pro	yes	combined	82	86	20	2	yes	7	100.1	yes	5.5	6	yes	no	no	25		0.3	1.1	1	2.4	0	TRUE				FN
67	42	21.5	72	40.7	sedentary	none	no	combined	41	41	31	0	yes	7	80.3	no	no	3	no	yes	no	40		0.3	1	7.7	9	1	FALSE		FP
68	58	29.1	24	81.4	active	none	yes	combined	81	72	40	2	yes	10	100.1	no	no	1	no	no	no	60		1	1	1	3	0	TRUE				FN
69	55	23	12	75.9	active	amateur	no	combined	95	89	25	3	yes	10	95.7	yes	3	6	yes	no	yes	48		1	1.1	1	3.1	0	FALSE			VN
70	52	28.4	12	45.1	sedentary	amateur	no	combined	72	73	35	3	no	1	45.1	no	no	5	no	no	yes	51		0.3	1.1	1	2.4	0	FALSE			VN
71	43	22.5	24	64.9	sedentary	none	no	combined	84	86	26	2	yes	9	51.7	yes	3	1	yes	no	no	34		0.4	1	1	2.4	0	FALSE			VN
72	58	24.4	6	60.5	active	none	yes	combined	80	82	31	2	no	1	55	no	no	1	no	no	no	30		0.3	2.7	1	4	0	FALSE			VN
73	38	18.6	24	78.1	sedentary	amateur	yes	combined	90	72	23	1	no	2	56.1	no	no	1	no	no	no	29		1	1	4.2	6.2	0	FALSE			VN
74	24	18.3	18	41.8	sedentary	none	no	combined	76	65	33	0	yes	10	95.7	no	no	2	no	no	no	56		0.3	1.1	7.7	9.1	1	TRUE	VP
75	37	23.4	12	79.2	sedentary	amateur	no	combined	84	83	33	2	no	3	44	yes	3	7	no	no	no	48		1	1.1	1	3.1	0	FALSE			VN
76	26	26.8	18	92.4	sedentary	amateur	no	combined	88	63	27	0	yes	10	100.1	yes	3	5	yes	no	no	27		1	1.1	7.7	9.8	1	TRUE	VP
77	43	19	15	66	physically demanding	amateur	yes	cam	80	65	20	2	yes	10	92	yes	15	5	yes	no	no	60		0.4	1.1	1	2.5	0	TRUE				FN
78	64	21.8	24	62	sedentary	none	no	cam	90	50	35	1	yes	10	96	no	no	no	no	no	no	60		0.3	1	4.2	5.5	0	TRUE				FN
79	34	22.1	18	52	sedentary	amateur	no	cam	80	80	36	2	no	7	79	yes	6	6	yes	no	no	58		0.3	1.1	1	2.4	0	FALSE			VN
80	50	23	24	69	sedentary	amateur	no	combined	80	70	46	3	no	5	68	yes	6	5	no	no	no	57		0.4	1	1	2.4	0	FALSE			VN
81	33	22.7	11	52	active	semi-pro	no	pincer	40	40	42	1	yes	10	96	yes	6	8	yes	no	no	53		0.3	2.7	4.2	7.2	1	TRUE	VP
82	33	24.1	6	73	sedentary	semi-pro	no	cam	66	70	34	0	yes	10	100	yes	3	9	yes	no	no	60		1	2.7	7.7	11.4	1	TRUE	VP
83	43	35.2	24	48	physically demanding	none	no	cam	84	60	34	0	yes	10	96	no	no	no	no	no	no	47		0.3	1	7.7	9	1	TRUE	VP
84	32	24.48	24	48	physically demanding	none	no	combined	76	70	50	2	no	5	68	no	no	no	no	yes	no	47		0.3	1	1	2.3	0	FALSE			VN
85	51	28.59	30	66	sedentary	amateur	yes	cam	84	60	25	3	yes	9	50	yes	36	7	no	no	yes	47		0.4	1	1	2.4	0	FALSE			VN
86	35	22.1	18	52	sedentary	amateur	no	cam	70	72	46	1	no	7	79	yes	6	6	yes	no	no	47		0.3	1.1	4.2	5.6	0	FALSE			VN
87	26	24.48	9	52	sedentary	semi-pro	no	cam	46	60	30	0	yes	6	96	yes	6	7	no	no	no	44		0.3	2.7	7.7	10.7	1	FALSE		FP
88	42	26.2	15	68	active	amateur	no	combined	86	62	26	2	no	5	65	no	no	no	no	no	yes	44		0.4	1.1	1	2.5	0	FALSE			VN
89	37	26.54	12	79	physically demanding	amateur	no	cam	82	72	39	2	yes	8	86	yes	8	7	yes	no	no	43		1	1.1	1	3.1	0	FALSE			VN
90	35	25.96	12	81	sedentary	amateur	no	cam	70	64	34	1	yes	8	96	no	8	5	no	no	no	43		1	1.1	4.2	6.3	1	FALSE		FP
91	18	22.1	12	66	sedentary	amateur	no	combined	42	70	35	0	yes	9	96	yes	6	9	yes	no	no	42		0.4	1.1	7.7	9.2	1	TRUE	VP
92	30	23.3	60	70	active	semi-pro	no	cam	86	68	24	1	yes	9	96	yes	12	7	yes	no	no	41		0.4	1	4.2	5.6	0	TRUE				FN
93	42	24.8	18	61	physically demanding	amateur	no	cam	88	60	35	2	yes	10	97	yes	7	5	yes	no	no	41		0.3	1.1	1	2.4	0	TRUE				FN
94	40	25.1	18	61	active	amateur	no	combined	74	72	36	1	yes	8	85	yes	9	5	no	no	no	40		0.3	1.1	4.2	5.6	0	FALSE			VN
95	38	23.1	9	70	sedentary	amateur	no	cam	70	60	34	0	yes	9	97	yes	12	7	yes	no	no	42		0.4	2.7	7.7	10.8	1	TRUE	VP
96	56	25.66	6	59	sedentary	amateur	no	cam	78	84	32	2	no	6	60	no	no	no	no	no	yes	38		0.3	2.7	1	4	0	FALSE			VN
97	25	22.2	20	73	active	semi-pro	no	cam	88	62	32	0	yes	10	100	yes	9	8	yes	no	no	36		1	1	7.7	9.7	1	TRUE	VP
98	18	22.1	6	69	sedentary	amateur	no	combined	40	65	34	0	yes	9	96	yes	9	9	yes	no	no	35		0.4	2.7	7.7	10.8	1	TRUE	VP
99	29	26.59	12	74	active	amateur	no	cam	74	78	22	0	yes	10	100	yes	8	9	yes	no	no	32		1	1.1	7.7	9.8	1	TRUE	VP
100	45	18.5	8	63	active	none	no	combined	40	64	38	1	yes	10	96	no	no	no	no	no	no	32		0.3	2.7	4.2	7.2	1	TRUE	VP
101	31	34.34	8	57	sedentary	amateur	yes	cam	94	72	26	1	yes	8	96	yes	9	7	no	no	no	31		0.3	2.7	4.2	7.2	1	TRUE	VP
102	42	24.22	84	57	physically demanding	semi-pro	no	cam	72	60	26	2	yes	8	84	yes	24	5	no	no	no	30		0.3	1	1	2.3	0	FALSE			VN
103	58	33.6	24	42	physically demanding	none	no	combined	36	74	45	1	yes	10	100	no	no	no	no	no	no	30		0.3	1	4.2	5.5	0	TRUE				FN
104	45	19.88	6	72	sedentary	amateur	yes	cam	42	78	30	0	yes	10	100	yes	7	7	yes	no	no	24		0.4	2.7	7.7	10.8	1	TRUE	VP
105	19	22.58	72	80	sedentary	semi-pro	no	combined	44	74	26	0	yes	8	96	yes	24	9	yes	yes	no	26		1	1	7.7	9.7	1	FALSE		FP
106	23	26.04	6	95	sedentary	semi-pro	yes	cam	80	60	34	0	yes	8	100	yes	6	9	yes	no	no	26		1	2.7	7.7	11.4	1	TRUE	VP
107	49	23.01	10	70	sedentary	none	yes	combined	42	66	24	0	yes	9	100	no	no	no	no	no	no	34		0.4	2.7	7.7	10.8	1	TRUE	VP
108	43	27.77	12	80	sedentary	semi-pro	yes	combined	64	76	44	1	yes	7	96	yes	8	8	no	no	no	26		1	1.1	4.2	6.3	1	TRUE	VP
109	36	24.7	12	75.4	active	semi-pro	yes	combined	58	75	35	1	yes	8	92.4	yes	8	10	yes	no	no	32		1	1.1	4.2	6.3	1	TRUE	VP
110	40	22.6	36	76.6	sedentary	amateur	no	combined	55	66	30	2	yes	9	89.1	yes	5	9	yes	no	no	31		1	1	1	3	0	FALSE			VN
111	29	21.2	8	68.8	active	semi-pro	no	cam	50	55	34	0	yes	10	100	yes	5	10	yes	no	no	34		0.4	2.7	7.7	10.8	1	TRUE	VP
112	27	29.6	36	74.2	physically demanding	amateur	yes	cam	58	65	35	2	yes	10	92.4	yes	6	9	no	no	no	36		1	1	1	3	0	TRUE				FN
113	23	25.4	18	64.4	physically demanding	semi-pro	yes	combined	56	65	30	1	yes	9	100	yes	4	8	yes	no	no	29		0.4	1.1	4.2	5.7	0	TRUE				FN
114	19	24.2	16	100	physically demanding	semi-pro	yes	combined	54	60	28	0	yes	9	100	yes	4	8	yes	no	no	31		1	1.1	7.7	9.8	1	TRUE	VP
115	40	25.5	14	100	sedentary	amateur	yes	cam	59	63	30	1	yes	10	88	yes	5	9	yes	no	no	26		1	1.1	4.2	6.3	1	FALSE		FP
116	21	22.5	18	74.1	active	amateur	no	combined	60	55	32	1	yes	8	100	yes	6	10	no	no	no	34		1	1.1	4.2	6.3	1	TRUE	VP
117	26	22.1	8	64.4	physically demanding	pro	no	combined	55	58	34	1	yes	9	78.1	yes	4	10	yes	no	no	34		0.4	2.7	4.2	7.3	1	FALSE		FP
118	20	21.2	20	66.8	sedentary	semi-pro	no	combined	55	58	33	0	yes	10	93.5	yes	4	10	yes	yes	no	29		0.4	1	7.7	9.1	1	FALSE		FP
119	44	25.2	30	64.4	sedentary	amateur	yes	cam	53	60	35	2	yes	8	92.4	yes	5	9	no	no	no	24		0.4	1	1	2.4	0	TRUE				FN
120	20	23.5	12	54.2	sedentary	amateur	no	cam	60	57	30	0	yes	10	81.4	yes	4	9	yes	no	no	36		0.3	1.1	7.7	9.1	1	FALSE		FP
121	19	27.2	15	64.9	sedentary	semi-pro	no	pincer	59	58	29	0	yes	6	100	yes	3	9	no	no	no	36		0.4	1.1	7.7	9.2	1	FALSE		FP
122	32	23.2	24	70.2	active	semi-pro	no	combined	60	55	30	1	yes	9	100	yes	4	8	yes	no	no	36		0.4	1	4.2	5.6	0	TRUE				FN
123	30	21.8	12	64.4	physically demanding	amateur	yes	combined	51	62	30	1	yes	8	92.4	yes	9	10	no	no	no	34		0.4	1.1	4.2	5.7	0	TRUE				FN
124	26	24.1	16	67.1	active	semi-pro	no	combined	55	60	32	0	yes	9	100	yes	4	10	yes	no	no	29		0.4	1.1	7.7	9.2	1	TRUE	VP
125	29	24.2	12	88.2	sedentary	amateur	no	cam	53	61	32	2	yes	9	87.8	yes	7	8	yes	no	no	26		1	1.1	1	3.1	0	FALSE			VN
126	34	26.6	14	74.1	sedentary	amateur	no	combined	55	58	36	1	yes	8	96	yes	8	9	no	no	no	28		1	1.1	4.2	6.3	1	TRUE	VP
127	34	28.2	18	64.7	active	amateur	no	cam	58	50	35	1	yes	9	97.9	yes	6	9	no	no	no	26		0.4	1.1	4.2	5.7	0	TRUE				FN
128	31	23.2	14	74.2	sedentary	amateur	yes	combined	60	57	34	1	yes	8	100	yes	4	10	yes	no	no	28		1	1.1	4.2	6.3	1	TRUE	VP
129	36	22.6	36	78.4	active	semi-pro	no	combined	64	58	33	2	yes	9	100	yes	5	8	yes	no	no	26		1	1	1	3	0	TRUE				FN
130	29	23.1	16	64.7	physically demanding	semi-pro	yes	combined	66	60	36	1	yes	9	90	yes	4	9	yes	no	no	28		0.4	1.1	4.2	5.7	0	TRUE				FN
131	24	21.6	8	66.2	active	pro	yes	cam	68	50	29	1	yes	10	88.4	yes	5	10	yes	no	no	25		0.4	2.7	4.2	7.3	1	FALSE		FP
132	17	29.7	18	76.4	active	semi-pro	no	cam	64	66	31	0	yes	10	98.2	yes	6	9	yes	no	no	35		1	1.1	7.7	9.8	1	TRUE	VP
133	39	22.6	48	60.2	active	amateur	no	combined	66	62	30	1	yes	9	96.8	yes	4	8	no	no	no	33		0.3	1	4.2	5.5	0	TRUE				FN
134	25	16.6	9	60.4	sedentary	semi-pro	yes	pincer	60	62	31	1	yes	10	84.3	yes	4	9	yes	no	no	36		0.3	2.7	4.2	7.2	1	FALSE		FP
135	34	25.6	8	62.4	active	amateur	no	combined	62	62	33	2	yes	10	96.8	yes	5	10	yes	yes	no	34		0.3	2.7	1	4	0	FALSE			VN
136	21	25.8	18	68.6	active	pro	no	cam	63	68	32	1	yes	9	81.4	no	4	9	yes	no	no	34		0.4	1.1	4.2	5.7	0	FALSE			VN
137	18	23.2	6	78.6	physically demanding	pro	no	combined	66	55	31	2	yes	10	92.4	yes	4	8	yes	no	no	35		1	2.7	1	4.7	0	TRUE				FN
138	47	31.4	20	74.2	sedentary	amateur	yes	combined	67	63	30	2	yes	7	92.4	yes	7	8	no	no	no	36		1	1	1	3	0	TRUE				FN
139	28	25.6	14	72.6	active	amateur	no	cam	65	70	28	1	yes	9	99	yes	7	4	yes	no	no	60		1	1.1	4.2	6.3	1	TRUE	VP
140	32	26.2	22	74.8	active	amateur	no	cam	50	65	28	1	yes	9	99	yes	8	4	yes	no	no	60		1	1	4.2	6.2	0	TRUE				FN
141	33	24.3	16	72.6	active	amateur	no	cam	55	72	25	1	yes	8	96.8	yes	8	6	yes	no	no	59		1	1.1	4.2	6.3	1	TRUE	VP
142	25	23.6	12	47.3	physically demanding	amateur	no	cam	55	65	28	1	yes	8	96.8	yes	12	6	yes	no	no	59		0.3	1.1	4.2	5.6	0	TRUE				FN
143	25	23.5	8	69.3	active	semi-pro	no	cam	58	60	26	0	yes	10	99	yes	7	9	yes	no	no	59		0.4	2.7	7.7	10.8	1	TRUE	VP
144	26	23.5	15	72.6	active	semi-pro	no	cam	60	72	24	0	yes	9	99	yes	6	9	yes	no	no	58		1	1.1	7.7	9.8	1	TRUE	VP
145	24	24.2	12	74.8	active	amateur	yes	cam	65	70	25	0	yes	9	96.8	yes	8	7	yes	no	no	58		1	1.1	7.7	9.8	1	TRUE	VP
146	29	25.1	14	69.3	sedentary	amateur	no	cam	55	70	26	1	yes	10	99	yes	7	7	yes	no	no	58		0.4	1.1	4.2	5.7	0	TRUE				FN
147	32	23.1	12	63.8	physically demanding	amateur	no	cam	50	80	30	1	yes	9	99	yes	8	7	yes	no	no	57		0.3	1.1	4.2	5.6	0	TRUE				FN
148	19	23.3	6	72.6	sedentary	semi-pro	no	cam	54	66	28	1	yes	10	99	yes	7	9	yes	no	no	57		1	2.7	4.2	7.9	1	TRUE	VP
149	29	22.8	8	47.3	sedentary	amateur	no	pincer	50	50	36	1	yes	9	94.6	yes	8	5	yes	no	no	56		0.3	2.7	4.2	7.2	1	TRUE	VP
150	34	21.2	14	74.8	physically demanding	amateur	no	cam	65	58	28	0	yes	10	99	yes	6	7	yes	no	no	56		1	1.1	7.7	9.8	1	TRUE	VP
151	30	19.8	8	74.8	sedentary	amateur	yes	cam	60	72	26	0	yes	9	99	yes	6	9	yes	no	no	55		1	2.7	7.7	11.4	1	TRUE	VP
152	26	22.2	12	58.3	active	amateur	no	combined	58	65	35	1	yes	9	96.8	yes	8	7	no	no	no	54		0.3	1.1	4.2	5.6	0	TRUE				FN
153	58	19.7	14	63.8	sedentary	amateur	yes	combined	55	68	36	1	yes	9	99	yes	9	6	yes	no	no	54		0.3	1.1	4.2	5.6	0	TRUE				FN
154	33	23.4	8	49.5	sedentary	amateur	no	cam	60	70	30	1	yes	8	95.6	yes	12	7	no	no	no	53		0.3	2.7	4.2	7.2	1	TRUE	VP
155	20	22.5	14	52.8	active	amateur	no	cam	54	64	28	1	yes	7	83.6	yes	9	7	yes	no	no	53		0.3	1.1	4.2	5.6	0	FALSE			VN
156	28	21.8	18	49.5	active	semi-pro	yes	combined	58	65	38	0	yes	6	68.2	no	no	8	no	yes	no	53		0.3	1.1	7.7	9.1	1	FALSE		FP
157	34	25.1	6	72.6	sedentary	amateur	yes	cam	64	79	30	0	yes	9	94.6	yes	7	7	yes	no	no	52		1	2.7	7.7	11.4	1	TRUE	VP
158	33	23.3	8	67.1	sedentary	amateur	no	combined	60	62	35	0	yes	10	99	yes	8	6	yes	no	no	52		0.4	2.7	7.7	10.8	1	TRUE	VP
159	32	24.9	16	59.4	physically demanding	amateur	no	combined	60	65	34	1	yes	9	94.6	yes	12	7	no	no	no	51		0.3	1.1	4.2	5.6	0	TRUE				FN
160	40	23.2	18	58.3	sedentary	none	yes	pincer	50	48	36	1	yes	10	99	no	no	1	yes	no	no	48		0.3	1.1	4.2	5.6	0	TRUE				FN
161	42	25.5	14	61.6	active	amateur	no	cam	70	85	24	0	yes	10	99	yes	7	7	yes	no	no	47		0.3	1.1	7.7	9.1	1	TRUE	VP
162	43	25.5	19	74.8	active	amateur	no	cam	65	80	27	1	yes	9	99	yes	8	7	yes	no	no	47		1	1	4.2	6.2	0	TRUE				FN
163	29	22.1	8	52.8	active	amateur	no	combined	60	75	38	1	yes	9	94.6	yes	7	5	yes	no	no	46		0.3	2.7	4.2	7.2	1	TRUE	VP
164	51	24.2	16	72.6	sedentary	none	yes	pincer	50	52	39	1	yes	8	94.6	no	no	2	yes	no	no	46		1	1.1	4.2	6.3	1	TRUE	VP
165	30	23.6	12	66	active	amateur	no	pincer	48	49	37	0	yes	9	95.7	yes	7	6	yes	no	no	45		0.4	1.1	7.7	9.2	1	TRUE	VP
166	33	23.1	16	52.8	active	semi-pro	no	cam	55	82	27	1	yes	9	94.6	yes	8	9	yes	no	no	44		0.3	1.1	4.2	5.6	0	TRUE				FN
167	18	22.8	6	74.8	sedentary	semi-pro	no	combined	50	70	35	0	yes	9	94.6	yes	9	9	yes	no	no	44		1	2.7	7.7	11.4	1	TRUE	VP
168	34	24.3	14	49.5	sedentary	semi-pro	no	cam	55	65	28	1	yes	8	83.6	yes	8	7	yes	no	no	43		0.3	1.1	4.2	5.6	0	FALSE			VN
169	37	23.4	12	52.8	sedentary	amateur	no	pincer	50	52	39	0	yes	10	99	yes	8	5	yes	no	no	43		0.3	1.1	7.7	9.1	1	TRUE	VP
170	31	24.3	16	72.6	active	amateur	no	cam	65	78	27	1	yes	9	94.6	yes	8	7	no	no	no	42		1	1.1	4.2	6.3	1	TRUE	VP
171	44	24.8	18	69.3	sedentary	amateur	no	cam	50	81	26	1	yes	9	99	yes	14	5	yes	no	no	41		0.4	1.1	4.2	5.7	0	TRUE				FN
172	41	23.2	23	52.8	sedentary	none	yes	pincer	50	50	36	1	yes	9	99	no	no	1	yes	no	no	41		0.3	1	4.2	5.5	0	TRUE				FN
173	43	27.5	26	49.5	active	none	yes	cam	65	78	28	2	no	6	68.2	no	no	5	no	no	yes	41		0.3	1	1	2.3	0	FALSE			VN
174	22	24.6	8	66	sedentary	amateur	yes	combined	65	68	36	0	yes	9	94.6	yes	8	6	yes	no	no	40		0.4	2.7	7.7	10.8	1	TRUE	VP
175	18	22.8	12	74.8	sedentary	semi-pro	no	combined	65	72	37	0	yes	9	99	yes	8	9	yes	no	no	40		1	1.1	7.7	9.8	1	TRUE	VP
176	29	22.1	4	72.6	active	amateur	no	combined	60	65	35	1	yes	8	83.6	yes	7	7	yes	no	no	39		1	2.7	4.2	7.9	1	FALSE		FP
177	38	23.9	9	58.3	sedentary	amateur	no	pincer	48	52	38	1	yes	10	99	yes	8	5	yes	no	no	36		0.3	2.7	4.2	7.2	1	TRUE	VP
178	33	24.2	8	52.8	sedentary	amateur	no	cam	68	80	24	0	yes	9	99	yes	7	7	yes	no	no	35		0.3	2.7	7.7	10.7	1	TRUE	VP
179	31	22.4	12	52.8	active	semi-pro	no	cam	72	82	26	1	yes	8	94.6	yes	8	7	no	no	no	35		0.3	1.1	4.2	5.6	0	TRUE				FN
180	41	26.2	14	66	sedentary	amateur	yes	pincer	52	50	36	1	yes	9	99	yes	9	1	yes	no	no	35		0.4	1.1	4.2	5.7	0	TRUE				FN
181	26	25.1	12	74.8	sedentary	amateur	no	combined	60	68	35	0	yes	9	99	yes	7	6	yes	no	no	34		1	1.1	7.7	9.8	1	TRUE	VP
182	17	24.3	8	74.8	sedentary	none	no	cam	65	84	28	0	yes	10	99	no	no	5	yes	no	no	34		1	2.7	7.7	11.4	1	TRUE	VP
183	24	22.4	12	72.6	sedentary	amateur	no	cam	55	75	27	0	yes	10	99	yes	9	6	yes	no	no	34		1	1.1	7.7	9.8	1	TRUE	VP
184	44	23.5	14	52.8	sedentary	amateur	no	combined	68	70	37	2	yes	10	99	yes	14	7	no	no	no	33		0.3	1.1	1	2.4	0	TRUE				FN
185	40	24.2	12	49.5	sedentary	amateur	no	pincer	46	50	37	0	yes	9	94.6	yes	9	6	yes	no	no	32		0.3	1.1	7.7	9.1	1	TRUE	VP
186	30	23.4	12	66	sedentary	amateur	no	pincer	48	50	36	1	yes	7	83.6	yes	12	6	no	no	no	32		0.4	1.1	4.2	5.7	0	FALSE			VN
187	32	21.2	14	72.6	active	amateur	no	combined	48	76	36	1	yes	9	94.6	yes	9	7	no	no	no	31		1	1.1	4.2	6.3	1	TRUE	VP
188	28	23.3	8	66	active	amateur	yes	combined	59	76	35	1	yes	8	99	yes	6	5	yes	no	no	31		0.4	2.7	4.2	7.3	1	TRUE	VP
189	38	25.2	14	52.8	sedentary	amateur	no	combined	64	83	37	1	yes	9	94.6	yes	8	6	yes	no	no	31		0.3	1.1	4.2	5.6	0	TRUE				FN
190	36	23.4	12	66	active	amateur	no	cam	58	82	30	1	yes	8	83.6	yes	14	4	yes	no	no	30		0.4	1.1	4.2	5.7	0	FALSE			VN
191	31	22.4	14	72.6	sedentary	amateur	no	cam	65	76	29	0	yes	8	94.6	yes	8	7	yes	no	no	30		1	1.1	7.7	9.8	1	TRUE	VP
192	37	24.3	12	58.3	sedentary	amateur	yes	pincer	50	46	36	0	yes	9	99	yes	9	5	yes	no	no	29		0.3	1.1	7.7	9.1	1	TRUE	VP
193	23	25.4	8	74.8	sedentary	amateur	no	cam	50	84	28	1	yes	9	99	yes	8	6	yes	no	no	29		1	2.7	4.2	7.9	1	TRUE	VP
194	35	23.5	12	49.5	active	semi-pro	no	combined	65	75	35	1	yes	9	83.6	yes	12	8	no	no	no	29		0.3	1.1	4.2	5.6	0	FALSE			VN
195	26	25.1	16	73.8	sedentary	amateur	no	cam	60	76	27	0	yes	9	94.6	yes	6	7	yes	no	no	28		1	1.1	7.7	9.8	1	TRUE	VP
196	38	24.6	14	74.8	sedentary	amateur	no	combined	55	80	35	0	yes	10	99	yes	7	5	yes	no	no	28		1	1.1	7.7	9.8	1	TRUE	VP
197	43	25.1	16	72.6	active	amateur	no	cam	55	78	29	1	yes	10	99	yes	8	5	yes	no	no	28		1	1.1	4.2	6.3	1	TRUE	VP
198	42	24.8	14	66	sedentary	amateur	no	combined	58	85	39	1	yes	9	94.6	yes	12	6	no	no	no	27		0.4	1.1	4.2	5.7	0	TRUE				FN
199	24	22.6	6	49.5	sedentary	amateur	no	combined	65	55	36	0	yes	9	95.7	yes	8	5	yes	no	no	27		0.3	2.7	7.7	10.7	1	TRUE	VP
200	27	25.2	8	52.8	active	amateur	yes	pincer	48	52	36	0	yes	8	94.6	yes	9	7	no	no	no	24		0.3	2.7	7.7	10.7	1	TRUE	VP
201	20	25.3	12	66	sedentary	amateur	no	misto	65	70	37	0	yes	10	99	yes	8	7	yes	no	no	24		0.4	1.1	7.7	9.2	1	TRUE	VP
202	30	24.13	10.5	72.7	active	amateur	no	cam	57	71	34.8	0	yes	9	94.7	yes	9	6	no	no	no	not recorded		1	2.7	7.7	11.4	1	TRUE	VP
203	46	23	24	53.9	sedentary	none	no	combined	62	68	52	1	yes	3	59.4	no	no	1	no	no	no	not recorded		0.3	1	4.2	5.5	0	FALSE			VN
204	25	22.1	3	95.7	sedentary	amateur	no	cam	85	82	40	1	yes	9	95.7	yes	24	8	yes	no	no	not recorded		1	2.7	4.2	7.9	1	TRUE	VP
205	22	23.4	2	63.8	physically demanding	none	no	combined	86	76	35	1	yes	7	61.6	no	-	5	no	no	no	not recorded		0.3	2.7	4.2	7.2	1	FALSE		FP
206	40	22	6	45.1	active	amateur	no	cam	59	52	25	1	yes	8	90.2	yes	24	5	yes	no	no	not recorded		0.3	2.7	4.2	7.2	1	TRUE	VP
207	26	23	30	53.9	sedentary	semi-pro	no	cam	86	54	47	0	yes	9	95.7	no	no	3	no	no	no	not recorded		0.3	1	7.7	9	1	FALSE		FP
208	38	22.5	48	78.1	physically demanding	semi-pro	no	combined	68	74	43	1	yes	6	59.4	yes	12	1	no	no	no	not recorded		1	1	4.2	6.2	0	FALSE			VN
209	28	23.2	8	45.1	physically demanding	semi-pro	yes	combined	82	68	40	1	yes	10	100	yes	7	5	no	no	no	not recorded		0.3	2.7	4.2	7.2	1	TRUE	VP
210	39	23.9	12	68.2	physically demanding	semi-pro	no	combined	73	63	37	1	yes	8	81.4	no	no	3	no	no	no	not recorded		0.4	1.1	4.2	5.7	0	FALSE			VN
211	26	22.7	12	48.4	sedentary	amateur	no	combined	75	80	33	1	no	3	81.4	yes	12	1	no	no	no	not recorded		0.3	1.1	4.2	5.6	0	FALSE			VN
212	44	19.9	12	38.5	sedentary	amateur	no	cam	79	79	32	0	no	3	61.6	yes	4	1	yes	no	no	not recorded		0.3	1.1	7.7	9.1	1	FALSE		FP
213	50	20.8	12	90.2	sedentary	amateur	yes	cam	82	68	33	1	yes	8	79.2	yes	3	1	no	no	no	not recorded		1	1.1	4.2	6.3	1	FALSE		FP
214	45	21	12	71.5	sedentary	amateur	yes	cam	73	58	43	1	no	4	100	yes	3	3	no	no	no	not recorded		0.4	1.1	4.2	5.7	0	FALSE			VN
215	35	16.2	24	68.2	active	amateur	no	combined	60	45	54	1	yes	7	79.2	yes	12	3	no	no	no	not recorded		0.4	1	4.2	5.6	0	FALSE			VN
216	51	21.6	12	95.7	sedentary	amateur	no	combined	85	87	41	2	yes	8	79.2	yes	4	3	yes	no	no	not recorded		1	1.1	1	3.1	0	FALSE			VN
217	31	22	36	41.8	physically demanding	amateur	yes	cam	78	61	34	1	no	4	61.6	no	no	3	no	no	yes	not recorded		0.3	1	4.2	5.5	0	FALSE			VN
218	38	24.6	12	90.2	active	amateur	no	combined	67	67	41	1	yes	10	100	no	no	3	no	no	no	not recorded		1	1.1	4.2	6.3	1	FALSE		FP
219	26	24.9	96	70.4	active	semi-pro	no	combined	69	75	43	1	yes	9	90.2	yes	4	3	no	no	no	not recorded		0.4	1	4.2	5.6	0	TRUE				FN
220	26	22.1	2	95.7	sedentary	amateur	no	combined	83	84	33	0	yes	10	100	yes	12	8	yes	no	no	not recorded		1	2.7	7.7	11.4	1	TRUE	VP
																						37.5473
mean	34.6409	24.1944	17.8841	67.9										8.43636			7.29213	6.20283		6	15	10.7786						123	155	103	20	45	52
DS	9.9236	2.77157	15.0153	13.5392										1.81333			4.24185	2.30009		0.0272727	0.0681818	24
min	17	16.2		27.5										9			7					60
max	64	37		100										10			5					34
median	34	24.1		69.3													8													SMO+	SMO-
																	3												T+	103	20	123
																	36												T-	52	45	97
																	40
																														155	65	220
																													SENS	0.664516
																													SPEC	0.692308
																													P(T+)	0.559091
																													p(S)	0.704545
																													PPV	0.837398
																													NPV	0.463918
